# Supplementary material for: Hierarchically structured Co3O4@carbon porous fibers derived from electrospun ZIF-67/PAN nanofibers as anodes for lithium ion batteries
Source: Royal Society of Chemistry journal article supplement (doi:10.1039/c8ta03397h), 2018-01-01
Supplement: c8ta03397h1.pdf [file c8ta03397h1.pdf]

Electronic Supplementary Material (ESI) for Journal of Materials Chemistry A.

This journal is © The Royal Society of Chemistry 2018

**Supplementary information**

**Hierarchically structured Co<sub>3</sub>O<sub>4</sub>@carbon porous fibers derived from  
electrospun ZIF-67/PAN nanofibers as anode of lithium ion batteries**

*Chuan-Ling Zhang,<sup>a\*</sup> Bing-Rong Lu,<sup>a</sup> Fu-Hu Cao,<sup>a</sup> Zhi-Long Yu,<sup>b</sup> Huai-Ping Cong<sup>a</sup>*

*and Shu-Hong Yu<sup>b\*</sup>*

## **Experimental section**

### **Materials.**

All chemicals are analytical grade and are used without further purification.

### **Synthesis of ZIF-67 NPs and the electrospun solution.**

A reported typical procedure was used with some modifications to synthesize ZIF-67 NPs.<sup>1</sup> Firstly, 1.456 g of  $\text{Co}(\text{NO}_3)_2 \cdot 6\text{H}_2\text{O}$  and 3.28 g of 2-methylimidazole were respectively dissolved in 50 mL of N, N-dimethylformamide (DMF) and the two solutions were quickly mixed together and were then magnetically stirred for 2 h at room temperature. After the reaction, the product was centrifuged and washed with DMF, and was redispersed in 5 mL of DMF by sonication. Finally, 0.35 g of PAN was added to the ZIF-67 DMF solution and was dissolved completely by stirring. The obtained homogeneous purple solution was used as the electrospun solution.

### **Preparation of ZIF-67/PAN nanofibers by electrospinning**

The electrospun solution was loaded into a 10 mL syringe that was connected to an 11.0 kV voltage (EST705, High voltage generator) and the nanofibers were connected by a copper net, the distance between needle and collector was about 10 cm, a syringe pump (PHD 2000 infusion, HARVARD APPARATUS) was used to control the flow rate at about  $0.2 \text{ mL h}^{-1}$ . After electrospinning, ZIF-67/PAN nanofibers were obtained.

### **Preparation of ES-CNCo<sub>3</sub>O<sub>4</sub> fibers**

ZIF-67/PAN nanofibers were heated to 200 °C for 2 h with a heating rate of  $1 \text{ }^\circ\text{C min}^{-1}$  and were further carbonized at 800 °C for 4 h with a heating rate of  $2 \text{ }^\circ\text{C min}^{-1}$  under the  $\text{H}_2/\text{Ar}$  atmosphere to obtain ES-CNCo. ES-CNCo was pyrolyzed in air at 360 °C for 10 min with a heating rate of  $5 \text{ }^\circ\text{C min}^{-1}$  to oxidize Co into  $\text{Co}_3\text{O}_4$ , and ES-CNCo<sub>3</sub>O<sub>4</sub> were obtained. The two comparative samples were prepared by the same procedures with ES-CNCo<sub>3</sub>O<sub>4</sub> but different precursors. CNCo<sub>3</sub>O<sub>4</sub> was prepared by directly carbonizing ZIF-67 NPs, while CS-CNCo<sub>3</sub>O<sub>4</sub> was prepared from the casting film of electrospun solution that was vacuum dried at 80 °C.

### **Characterizations.**

Transmission electron microscope (TEM) images were obtained on a Hitachi H-7650 with a voltage of 100 kV. High resolution TEM (HRTEM), EDS and element mapping were obtained on a JEM- ARM 200F with an acceleration voltage of 200 kV. Scanning electron microscopy (SEM) images were obtained on a Zeiss Supra 40 with an acceleration energy of 5 kV. X-ray photoelectron spectrometer (XPS) spectra were obtained using an ESCALAB250Xi equipped with an excitation source of Al K $\alpha$  radiation. X-Ray diffraction (XRD) spectra were obtained on an X, Pert PRO MPD using Cu K $\alpha$  radiation as the excitation source. Pore volume and size analysis were performed by Brunauer-Emmett-Teller (BET) and Barrett-Joyner-Halenda (BJH). N<sub>2</sub> sorption analysis was conducted using an ASAP 2020 accelerated surface area and porosimetry instrument (Micromeritics), equipped with the automated surface area. Raman spectra were examined on an LABRAM-HR confocal laser micro Raman spectrometer. TGA was obtained on a Perkin Elmer Diamond thermal analyzer with a heating rate of 10 °C min<sup>-1</sup> in air.

### **Electrochemical measurements.**

The working electrode material was prepared by mixing the materials of ES-CNC<sub>3</sub>O<sub>4</sub>, Ketjen black, and poly-(vinyl difluoride) (PVDF) on a copper foil with a weight ratio of 8:1:1, and the composite were vacuum dried at 80 °C for overnight. The copper foil was cut into disks with a diameter of 12 mm. The loading of active materials was about 1 mg cm<sup>-1</sup>. Lithium tablets were used as the counter electrode. The electrolyte was composed of 1 M LiPF<sub>6</sub> in ethylene carbonate/dimethyl carbonate (50: 50 wt %). The glass fiber (GF/D, Whatman) was used as a separator. Cells assembly was conducted in a glove box filled with argon gas. The charging-discharge test was performed at an Arbin BT-1 system with the potential among 0.01-3 V at several different current densities. The CV tests were carried on an electrochemical workstation (Autolab PG302N) with the voltage range of 0.01-3 V and a scan rate of 0.1 mV s<sup>-1</sup>.

**Comparison lithium ion chemical diffusion coefficients through a galvanostatic intermittent titration technique (GITT).**

From the measurements of GITT, the cells were discharged at  $0.5 \text{ A g}^{-1}$  for 20 min, and then relaxed under open circuit for 10 h.

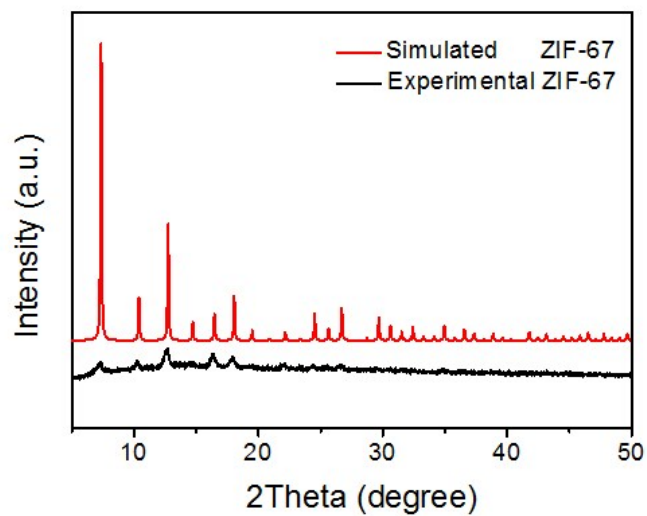

**Fig. S1.** Powder XRD pattern of ZIF-67 NPs.

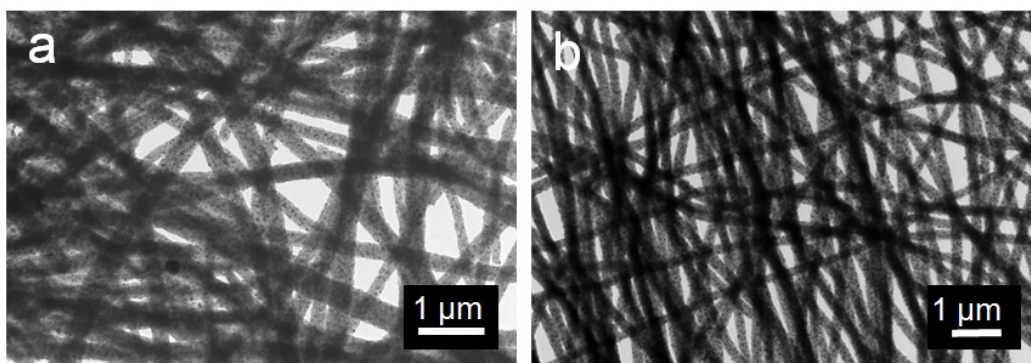

**Fig. S2.** TEM images of (a) ES-CNCo and (b) ES-CNC<sub>3</sub>O<sub>4</sub>.

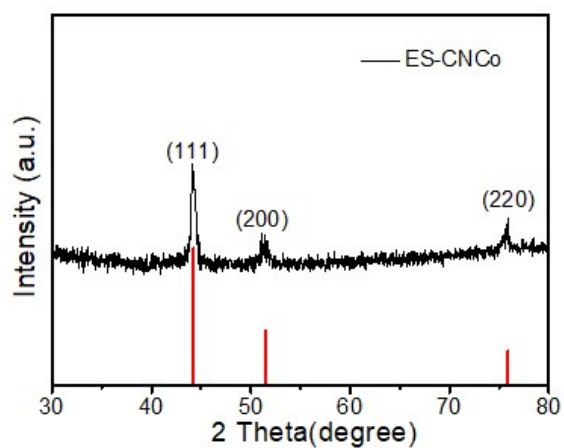

**Fig. S3.** Powder XRD pattern of ES-CNCo.

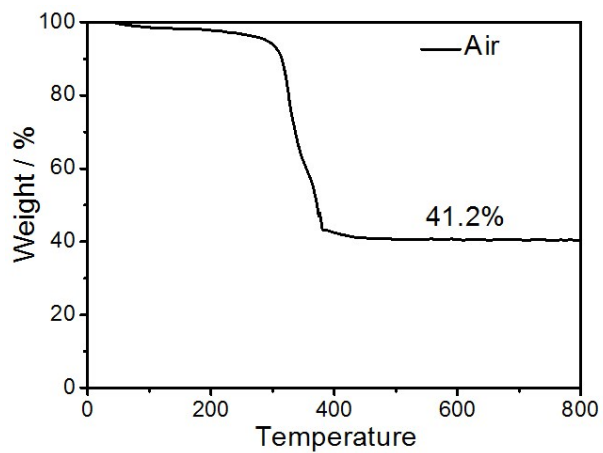

**Fig. S4.** TG curve of ES-CNCo.

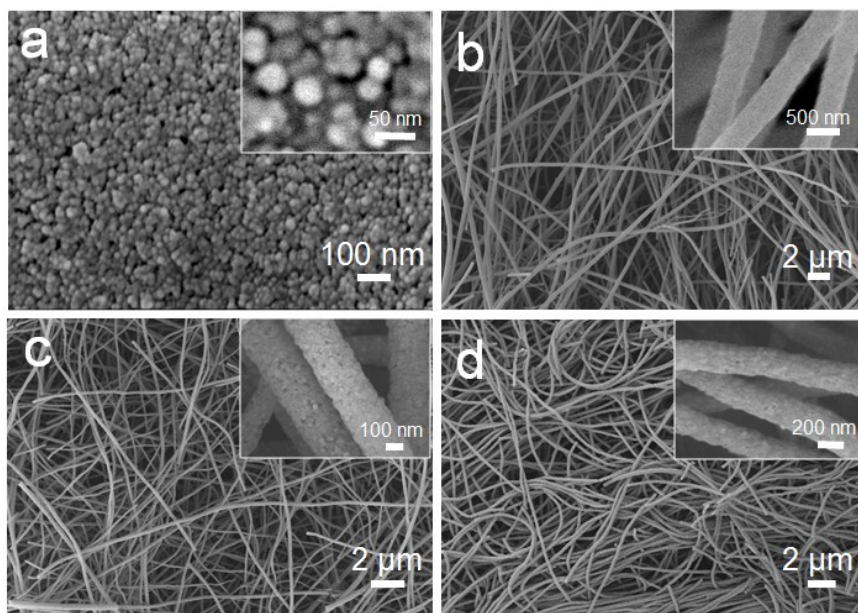

**Fig. S5.** SEM images of (a) ZIF-67 NPs, (b) ZIF-67/PAN, (c) ES-CNCo, and (d) ES-CNCCo<sub>3</sub>O<sub>4</sub>.

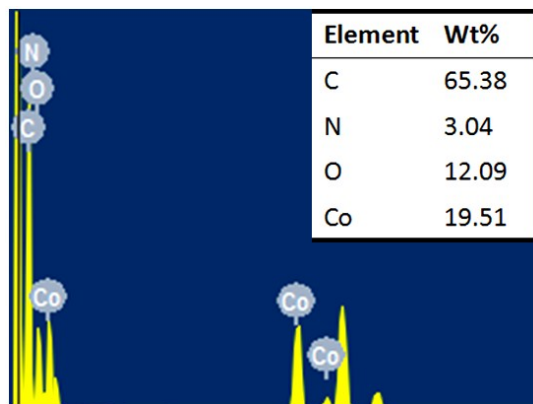

**Fig. S6.** EDS spectrum of ES-CNCCo<sub>3</sub>O<sub>4</sub>, which shows the existence of C, N, O, and Co.

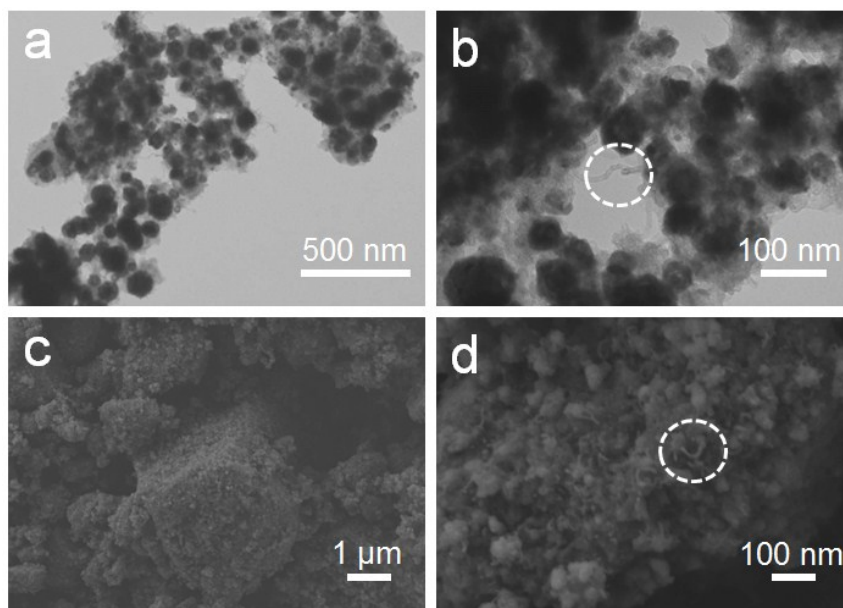

**Fig. S7.** TEM (a, b) and SEM images (c, d) of  $\text{CNC-Co}_3\text{O}_4$  with different magnifications.

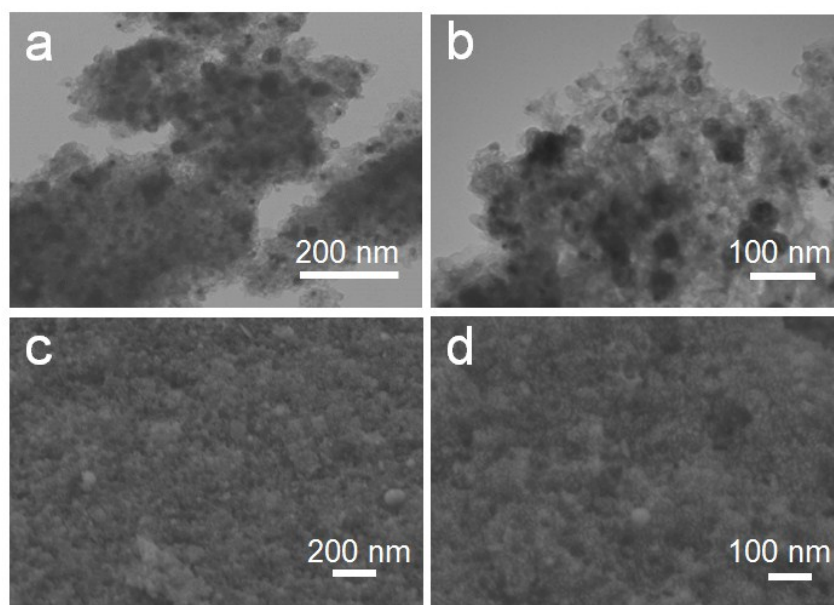

**Fig. S8.** TEM (a, b) and SEM images (c, d) of  $\text{CS-CNC-Co}_3\text{O}_4$  with different magnifications.

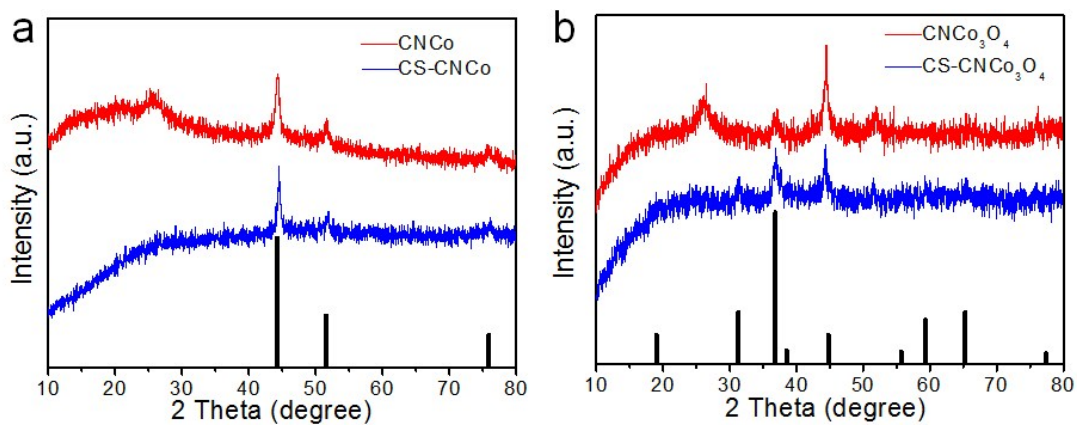

**Fig. S9.** Powder XRD patterns of the two comparative samples before (a) and after (b) oxidation.

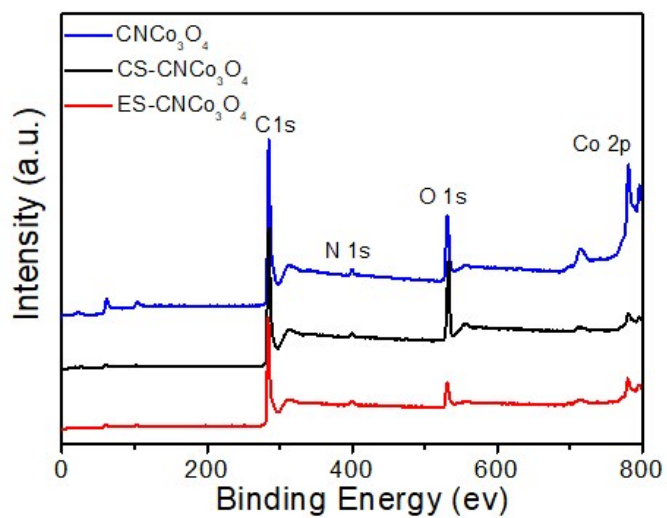

**Fig. S10.** XPS survey spectra of  $\text{CNCo}_3\text{O}_4$ ,  $\text{CS-CNC}_3\text{O}_4$ , and  $\text{ES-CNC}_3\text{O}_4$ .



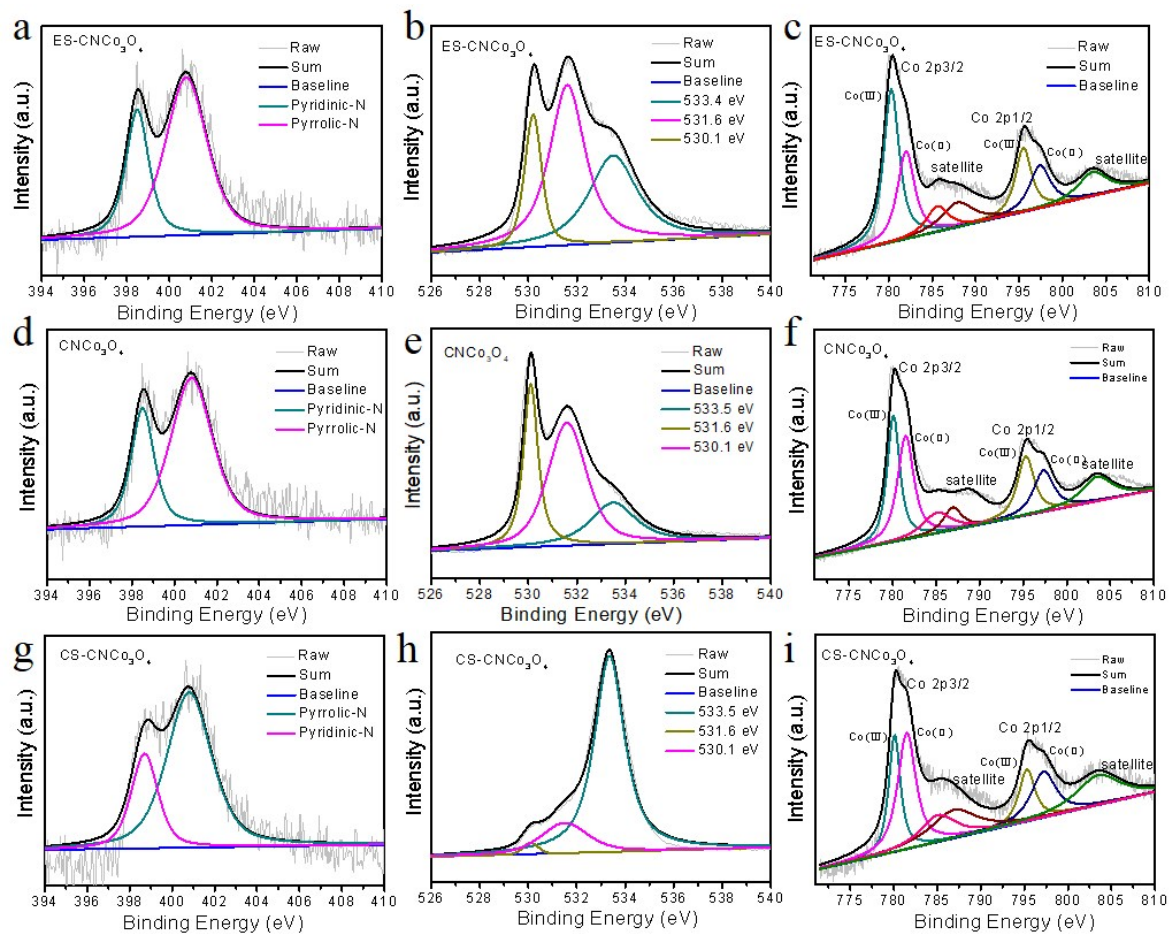

**Fig. S11.** N1s XPS spectra of (a) ES-CNC $\text{Co}_3\text{O}_4$ , (d) CNC $\text{Co}_3\text{O}_4$ , and (g) CS-CNC $\text{Co}_3\text{O}_4$ . O1s XPS spectra of (b) ES-CNC $\text{Co}_3\text{O}_4$ , (e) CNC $\text{Co}_3\text{O}_4$ , and (h) CS-CNC $\text{Co}_3\text{O}_4$ . Co2p XPS spectra of (c) ES-CNC $\text{Co}_3\text{O}_4$ , (f) CNC $\text{Co}_3\text{O}_4$ , and (i) CS-CNC $\text{Co}_3\text{O}_4$ .

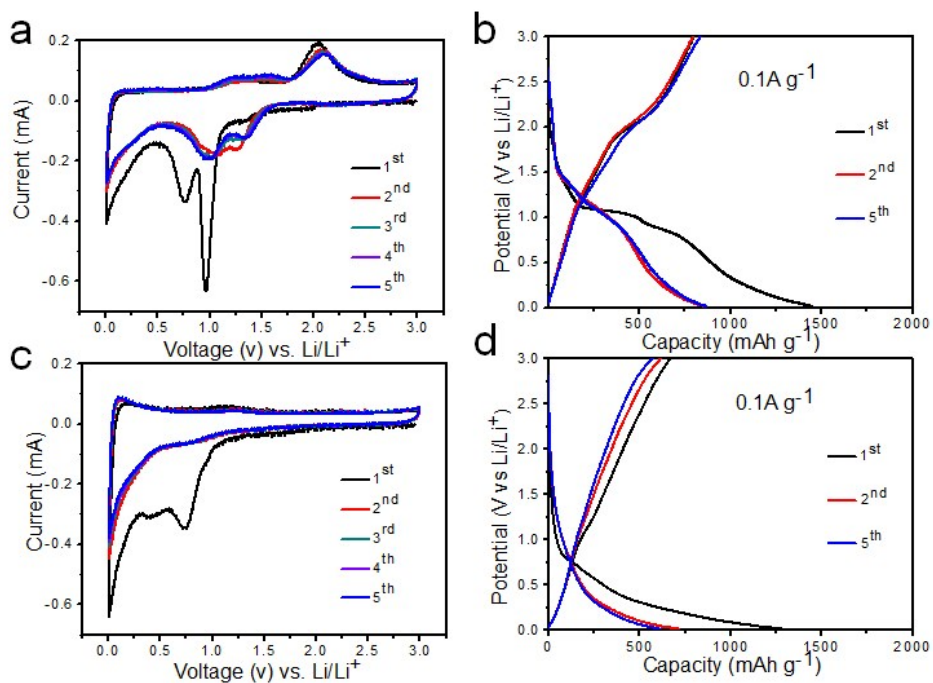

**Fig. S12.** CV profiles of  $\text{CNCu}_3\text{O}_4$  (a) and  $\text{CS-CNCu}_3\text{O}_4$  (c). GDC profiles of  $\text{CNCu}_3\text{O}_4$  (b) and  $\text{CS-CNCu}_3\text{O}_4$  (d) at  $0.1 \text{ A g}^{-1}$ .

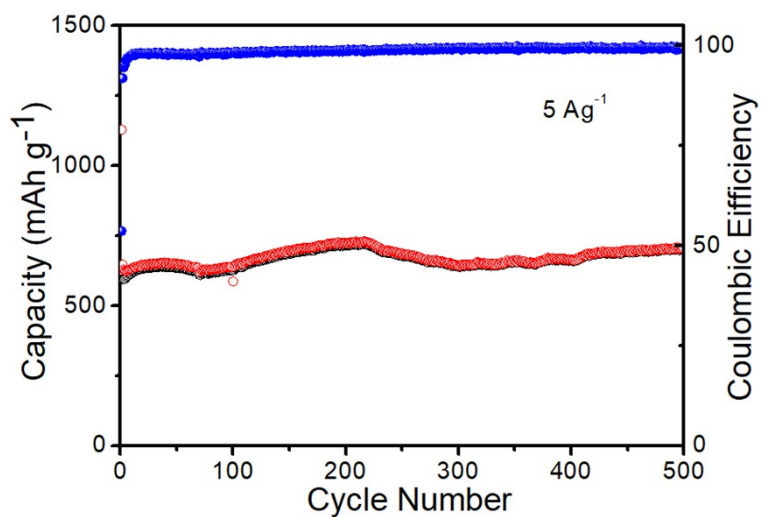

**Fig. S13.** Cycling performance of  $\text{ES-CNCu}_3\text{O}_4$  at  $2 \text{ A g}^{-1}$ .

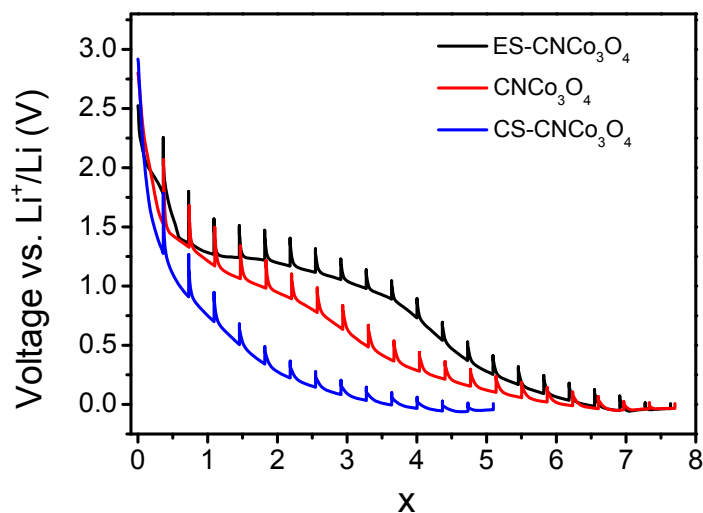

**Fig. S14.** GITT curves (“x” represents the stoichiometry of intercalated lithium ion per mole of samples) of the three samples.

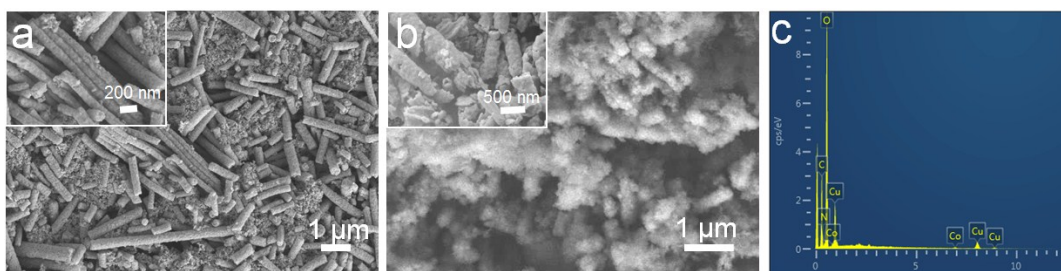

**Fig. S15.** SEM images of ES-CNC<sub>3</sub>O<sub>4</sub> before (a) and after (b) 500 cycles at 1 A g<sup>-1</sup>. (c) The corresponding EDS spectrum of ES-CNC<sub>3</sub>O<sub>4</sub>. Insets in (a) and (b) are their corresponding magnified SEM images.

**Table S1.** XPS element contents of C, N, O, and Co in ES-CNC<sub>3</sub>O<sub>4</sub>, CS-CNC<sub>3</sub>O<sub>4</sub>, and CNC<sub>3</sub>O<sub>4</sub>, respectively.

| Element | Weight (%)                         |                                    |                                 |
|---------|------------------------------------|------------------------------------|---------------------------------|
|         | ES-CNC <sub>3</sub> O <sub>4</sub> | CS-CNC <sub>3</sub> O <sub>4</sub> | CNC <sub>3</sub> O <sub>4</sub> |
| C       | 66.70                              | 72.00                              | 63.48                           |
| N       | 2.92                               | 2.40                               | 2.67                            |
| O       | 13.85                              | 20.14                              | 14.30                           |
| Co      | 16.53                              | 5.46                               | 19.54                           |

**Table S2.** BET data and BJH summary of ES-CNC<sub>3</sub>O<sub>4</sub>, CS-CNC<sub>3</sub>O<sub>4</sub>, and CNC<sub>3</sub>O<sub>4</sub>.

| Samples                            | BET surface area (m <sup>2</sup> g <sup>-1</sup> ) | Total pore volume (cm <sup>3</sup> g <sup>-1</sup> ) |
|------------------------------------|----------------------------------------------------|------------------------------------------------------|
| ES-CNC <sub>3</sub> O <sub>4</sub> | 338.439                                            | 0.353                                                |
| CNC <sub>3</sub> O <sub>4</sub>    | 81.620                                             | 0.303                                                |
| CS-CNC <sub>3</sub> O <sub>4</sub> | 267.361                                            | 0.356                                                |

Table S3. Comparison of electrochemical performances of ES-CNCo<sub>3</sub>O<sub>4</sub> and Co<sub>3</sub>O<sub>4</sub> based materials in previous reports.

| Materials                                           | Current density (mA/g) | Initial Discharge Capacity (mAh/g) | Initial Charge Capacity (mAh/g) | Reversible Capacity (mAh/g) after (Cycle number) at current density(mA/g) | reference                                                            |
|-----------------------------------------------------|------------------------|------------------------------------|---------------------------------|---------------------------------------------------------------------------|----------------------------------------------------------------------|
| <b>ES-CNCo<sub>3</sub>O<sub>4</sub></b>             | <b>100</b>             | <b>1824</b>                        | <b>1003</b>                     | <b>1100(200)(100)</b>                                                     | <b>This Work</b>                                                     |
| Co <sub>3</sub> O <sub>4</sub> @CNT                 | 100                    |                                    |                                 | 700(100)(100)                                                             | <i>Angew. Chem. Inter. Ed.</i> <b>2015</b> , 54, 7060                |
| Co <sub>3</sub> O <sub>4</sub> /PCNF                | 100                    | 1187                               | 1006                            | 952(100)(100)                                                             | <i>J. Mater. Chem. A.</i> <b>2014</b> , 2, 16939                     |
| 70%Co <sub>3</sub> O <sub>4</sub> /NMEG             | 100                    | 1037                               | 799                             | 910(100)(100)                                                             | <i>Nano Energy.</i> <b>2014</b> , 3, 134                             |
| C-doped Co <sub>3</sub> O <sub>4</sub> HNFs         | 200                    | 1385                               | 972                             | 1125(200)(100)                                                            | <i>Adv. Funct. Mater.</i> <b>2016</b> , 26, 1428                     |
| Hollow Co <sub>3</sub> O <sub>4</sub> nanoparticles | 50                     | 1107                               | 880                             | 880(50)(50)                                                               | <i>ACS Nano.</i> <b>2015</b> , 9, 1775                               |
| MWCNTs/Co <sub>3</sub> O <sub>4</sub>               | 100                    | 1171                               | 812                             | 813(100)(100)                                                             | <i>ACS Nano.</i> <b>2015</b> , 9, 1592                               |
| C@Co <sub>3</sub> O <sub>4</sub> @COAL              | 200                    | 1377                               | 767                             | 755(100)(200)                                                             | <i>Carbon.</i> <b>2016</b> , 104, 1                                  |
| Co <sub>3</sub> O <sub>4</sub> parallelepiped       | 100                    | 1608                               | 1080                            | 1100(50)(100)                                                             | <i>J. Mater. Chem. A.</i> <b>2015</b> , 3, 22542                     |
| Co <sub>3</sub> O <sub>4</sub> /EG                  | 30                     | 1000                               | 713                             | 722(50)(100)                                                              | <i>Carbon.</i> <b>2015</b> , 95, 494                                 |
| Co <sub>3</sub> O <sub>4</sub> hollow dodecahedra   | 100                    | 1317                               | 921                             | 780(100)(100)                                                             | <i>Small</i> , <b>2014</b> , 10, 1932                                |
| CNT/Co <sub>3</sub> O <sub>4</sub>                  | 100                    | 1840                               | 1281                            | 1256(200)(100)                                                            | <i>Angew. Chem. Int. Ed.</i> <b>2016</b> , 55, 5990                  |
| G-Co <sub>3</sub> O <sub>4</sub>                    | 90                     | 1635.1                             | 1112.1                          | (990.8)(100)(90)                                                          | <i>Acs Applied Materials &amp; Interfaces.</i> <b>2017</b> , 9, 9662 |
| Co <sub>3</sub> O <sub>4</sub> @Co@GO               | 100                    | 1550                               | 843                             | (686)(60)(200)                                                            | <i>Chem. Eng. J.</i> <b>2017</b> , 321, 495                          |
| CF@Co <sub>3</sub> O <sub>4</sub>                   | 100                    | 630                                | 392                             | (420)(150)(100)                                                           | <i>J. Electroanal. Chem.</i> <b>2017</b> , 807, 196                  |

## References

- 1 Y.-Z. Chen, C. Wang, Z.-Y. Wu, Y. Xiong, Q. Xu, S.-H. Yu, H.-L. Jiang, *Adv. Mater.*, 2015, **27**, 5010-5016.
